# Supplementary material
Source: publisher site journal article supplement (https://static.cambridge.org/content/id/urn:cambridge.org:id:article:S0016756820000527/resource/name/S0016756820000527supp001.doc)
Supplement: Supplementary file 1 [file S0016756820000527supp001.doc]

***‘Geological Magazine’***

Lithospheric mantle, asthenosphere, slab and crustal contribution in petrogenesis of Eocene to Miocene volcanic rocks from the west Alborz Magmatic Assemblage, SE Ahar, Iran

AHMAD AHMADVAND*, MOHAMMAD REZA GHORBANI*†, MIR ALI ASGHAR MOKHTARI *‡, YI CHEN §¶, WILLIAM AMIDON ∏, JOSE FRANCISCO SANTOS** & MOHAMMAD PAYDARI *

**Supplementary Material**

Supplementary Table S1. Data of reference standard for major elements.

| Reference standard | | GSR-1 | reference values | GSR-4 | reference values | GSR-9 | reference values | GSR-10 | reference values |
| --- | --- | --- | --- | --- | --- | --- | --- | --- | --- |
| SiO2 | mass% | 72.79 | 72.83 | 90.22 | 90.36 | 59.72 | 59.68 | 35.82 | 35.69 |
| TiO2 | mass% | 0.29 | 0.29 | 0.27 | 0.26 | 0.76 | 0.77 | 7.74 | 7.69 |
| Al2O3 | mass% | 13.41 | 13.4 | 3.42 | 3.52 | 16.43 | 16.56 | 14.17 | 14.14 |
| TFe2O3 | mass% | 2.13 | 2.14 | 3.23 | 3.22 | 6.11 | 6.06 | 24.77 | 24.75 |
| MnO | mass% | 0.06 | 0.06 | 0.02 | 0.02 | 0.09 | 0.09 | 0.19 | 0.19 |
| MgO | mass% | 0.43 | 0.42 | 0.08 | 0.08 | 2.71 | 2.81 | 5.13 | 5.25 |
| CaO | mass% | 1.57 | 1.55 | 0.28 | 0.3 | 4.74 | 4.72 | 9.97 | 9.86 |
| Na2O | mass% | 3.08 | 3.13 | 0.05 | 0.06 | 4.06 | 4.05 | 2.13 | 2.11 |
| K2O | mass% | 4.93 | 5.01 | 0.66 | 0.65 | 3.51 | 3.5 | 0.14 | 0.15 |
| P2O5 | mass% | 0.09 | 0.09 | 0.22 | 0.22 | 0.33 | 0.34 | 0.03 | 0.03 |
| LOI | mass% | 0.77 | 0.69 | 1.1 | 1.1 | 1.0 | 1.04 | 0.0 | 0.0 |
| SUM | mass% | 99.55 | 99.61 | 99.55 | 99.8 | 99.46 | 99.62 | 100.1 | 99.9 |

| No. | W19064005 | Ref | W19064004 | Ref | W19064003 | Ref |
| --- | --- | --- | --- | --- | --- | --- |
| Standards | AGV-2 | AGV-2 | BHVO-2 | BHVO-2 | BCR-2 | BCR-2 |
| Comments | Analytical values | Reference values | Analytical values | Reference values | Analytical values | Reference values |
| Li | 9.3 | 11.0 | 4.3 | 4.8 | 8.6 | 9.0 |
| Be | 2.3 | 2.3 | 1.0 | 1.0 | 2.1 |  |
| Sc | 12.2 | 13.0 | 32.4 | 32.0 | 33.3 | 33.0 |
| V | 118.9 | 120.0 | 324.6 | 317.0 | 409.7 | 416.0 |
| Cr | 15.2 | 16.0 | 288.6 | 280.0 | 14.9 | 16.5 |
| Co | 15.5 | 16.0 | 45.7 | 45.0 | 36.8 | 37.0 |
| Ni | 18.8 | 20.0 | 126.5 | 119.0 | 12.8 | 13.0 |
| Cu | 48.4 | 53.0 | 131.5 | 127.0 | 19.2 | 18.4 |
| Zn | 84.8 | 86.0 | 107.0 | 103.0 | 130.7 | 133.0 |
| Ga | 20.8 | 20.0 | 22.0 | 21.7 | 22.4 | 23.0 |
| Rb | 68.5 | 66.3 | 9.4 | 9.1 | 45.0 | 46.9 |
| Sr | 658.4 | 661.0 | 400.7 | 396.0 | 337.5 | 340.0 |
| Y | 19.5 | 20.0 | 26.4 | 26.0 | 37.2 | 37.0 |
| Zr | 229.4 | 230.0 | 170.3 | 172.0 | 180.3 | 184.0 |
| Nb | 14.1 | 14.5 | 18.9 | 18.1 | 12.3 | 12.6 |
| Sn | 2.3 | 2.3 | 1.6 | 1.7 | 1.9 | 2.0 |
| Cs | 1.1 | 1.2 | 0.1 | 0.1 | 1.1 | 1.1 |
| Ba | 1121.0 | 1130.0 | 129.7 | 131.0 | 665.6 | 677.0 |
| La | 39.3 | 37.9 | 15.5 | 15.2 | 24.5 | 24.9 |
| Ce | 69.1 | 68.6 | 38.5 | 37.5 | 52.3 | 52.9 |
| Pr | 7.9 | 7.8 | 5.4 | 5.4 | 6.8 | 6.7 |
| Nd | 30.3 | 30.5 | 25.1 | 24.5 | 28.3 | 28.7 |
| Sm | 5.5 | 5.5 | 6.5 | 6.1 | 6.8 | 6.6 |
| Eu | 1.6 | 1.5 | 2.1 | 2.1 | 2.0 | 2.0 |
| Gd | 4.6 | 4.5 | 6.5 | 6.2 | 6.6 | 6.8 |
| Tb | 0.6 | 0.6 | 1.0 | 0.9 | 1.1 | 1.1 |
| Dy | 3.6 | 3.5 | 5.5 | 5.3 | 6.4 | 6.4 |
| Ho | 0.7 | 0.7 | 1.0 | 1.0 | 1.3 | 1.3 |
| Er | 1.9 | 1.8 | 2.6 | 2.5 | 3.6 | 3.7 |
| Tm | 0.2 | 0.3 | 0.3 | 0.3 | 0.5 | 0.5 |
| Yb | 1.6 | 1.6 | 2.1 | 2.0 | 3.3 | 3.4 |
| Lu | 0.3 | 0.2 | 0.3 | 0.3 | 0.5 | 0.5 |
| Hf | 5.3 | 5.0 | 4.4 | 4.4 | 4.7 | 4.9 |
| Ta | 0.8 | 0.9 | 1.2 | 1.1 | 0.8 | 0.8 |
| Tl | 0.3 | 0.3 | 0.0 | 0.1 | 0.3 |  |
| Pb | 13.2 | 13.2 | 1.7 | 1.6 | 10.3 | 11.0 |
| Th | 6.2 | 6.1 | 1.2 | 1.2 | 5.9 | 5.7 |
| U | 1.9 | 1.9 | 0.4 | 0.4 | 1.7 | 1.7 |

Supplementary Table S2. Data of reference standard for trace elements.
